# Supplementary material for: I-Kappa-B-Zeta Regulates Interleukin-17A/Tumor Necrosis Factor-Alpha Mediated Synergistic Induction of Interleukin-19 and Interleukin-20 in Humane Keratinocytes
Source: PubMed Central journal article supplement — Ann Dermatol. 2021 Mar 8;33(2):122–30. doi: 10.5021/ad.2021.33.2.122 (PMC8081996; doi:10.5021/ad.2021.33.2.122), 2021-03-08
Supplement: ad-33-122-s001.pdf [file ad-33-122-s001.pdf]

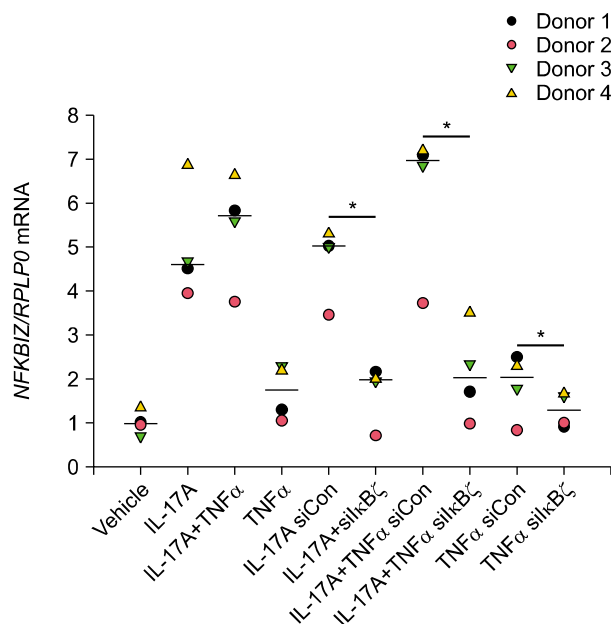

**Supplementary Fig. 1.** Knockdown of *NFKBIZ* by *siκBζ*. Human keratinocytes were transfected with *κBζ* siRNA (*siκBζ*) or control siRNA (*siCon*) before stimulated with IL-17A (100 ng/ml), *TNFα* (10 ng/ml) or the combinations as indicated for 24 hours (n=4). mRNA expression was analysed by qPCR, and *RPLP0* was used as a reference gene for normalisation. Horizontal lines represent medians. IL: interleukin, *TNFα*: tumour necrosis factor alpha, *κBζ*: I-kappa-B-zeta. \**p*<0.05 comparing the cells transfected with *siκBζ* with the cells transfected with *siCon*.
