# Supplementary material for: I-Kappa-B-Zeta Regulates Interleukin-17A/Tumor Necrosis Factor-Alpha Mediated Synergistic Induction of Interleukin-19 and Interleukin-20 in Humane Keratinocytes
Source: PubMed Central journal article supplement — Ann Dermatol. 2021 Mar 8;33(2):122–30. doi: 10.5021/ad.2021.33.2.122 (PMC8081996; doi:10.5021/ad.2021.33.2.122), 2021-03-08
Supplement: ad-33-122-s002.pdf [file ad-33-122-s002.pdf]

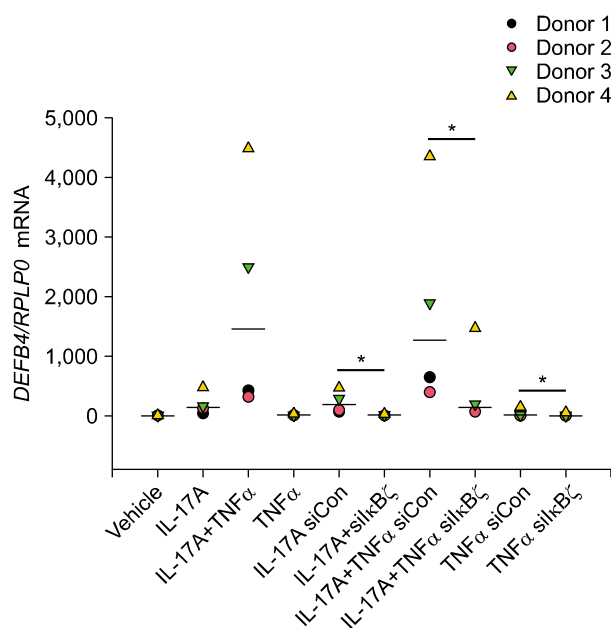

**Supplementary Fig. 2.** *DEFB4* expression was synergistically induced by IL-17A/TNF  $\alpha$  through an I  $\kappa$  B  $\zeta$ -dependent mechanism. Human keratinocytes were transfected with I  $\kappa$  B  $\zeta$  siRNA (sil  $\kappa$  B  $\zeta$ ) or control siRNA (siCon) before stimulated with IL-17A (100 ng/ml), TNF  $\alpha$  (10 ng/ml) or the combinations as indicated for 24 hours (n=4). mRNA expression was analysed by qPCR, and *RPLP0* was used as a reference gene for normalisation. Horizontal lines represent medians. IL: interleukin, TNF  $\alpha$ : tumour necrosis factor alpha, I  $\kappa$  B  $\zeta$ : I-kappa-B-zeta. \* $p < 0.05$  comparing the cells transfected with sil  $\kappa$  B  $\zeta$  with the cells transfected with siCon.
