# Supplementary material for: I-Kappa-B-Zeta Regulates Interleukin-17A/Tumor Necrosis Factor-Alpha Mediated Synergistic Induction of Interleukin-19 and Interleukin-20 in Humane Keratinocytes
Source: PubMed Central journal article supplement — Ann Dermatol. 2021 Mar 8;33(2):122–30. doi: 10.5021/ad.2021.33.2.122 (PMC8081996; doi:10.5021/ad.2021.33.2.122), 2021-03-08
Supplement: ad-33-122-s003.pdf [file ad-33-122-s003.pdf]

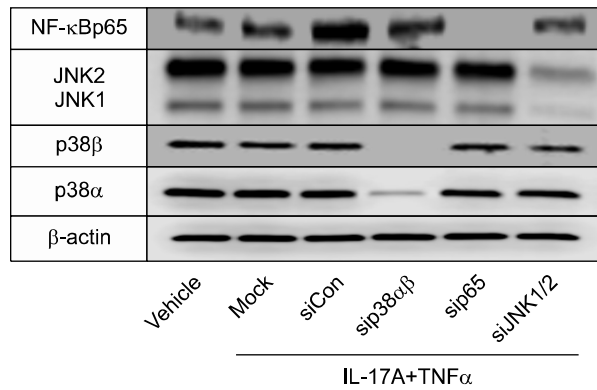

**Supplementary Fig. 3.** NF- $\kappa$  B, JNK, p38  $\alpha$  and  $\beta$  were silenced by siRNA. Human keratinocytes were transfected with specific siRNAs directed against NF- $\kappa$  B p65, JNK1/2, p38  $\alpha$  and  $\beta$  before stimulated with IL-17A (100 ng/ml) and TNF  $\alpha$  (10 ng/ml). As controls siCon and Mock were added. Protein levels of NF- $\kappa$  B p65, p38  $\alpha$ , p38  $\beta$ , and JNK1/2 were examined by Western blotting (n=3).  $\beta$ -actin was used as loading control. One representative donor is shown. IL: interleukin, TNF  $\alpha$ : tumour necrosis factor alpha.
